# Supplementary material
Source: PubMed Central journal article supplement (PMC3439554)
Supplement: NIHMS378270-supplement-1_si_001.pdf [file NIHMS378270-supplement-1_si_001.pdf]

Supporting Information

**Near-Infrared Emitting Squaraine Dyes with High 2PA Cross Sections for Multiphoton  
Fluorescence Imaging**

*Hyo-Yang Ahn,<sup>a</sup> Sheng Yao,<sup>a</sup> Xuhua Wang,<sup>a</sup> and Kevin D. Belfield<sup>\*a,b</sup>*

<sup>a</sup>Department of Chemistry and <sup>b</sup>CREOL, The College of Optics and Photonics,

University of Central Florida, P.O. Box 162366, Orlando, FL 32816-2366, USA

*1*H NMR and <sup>13</sup>C NMR spectra

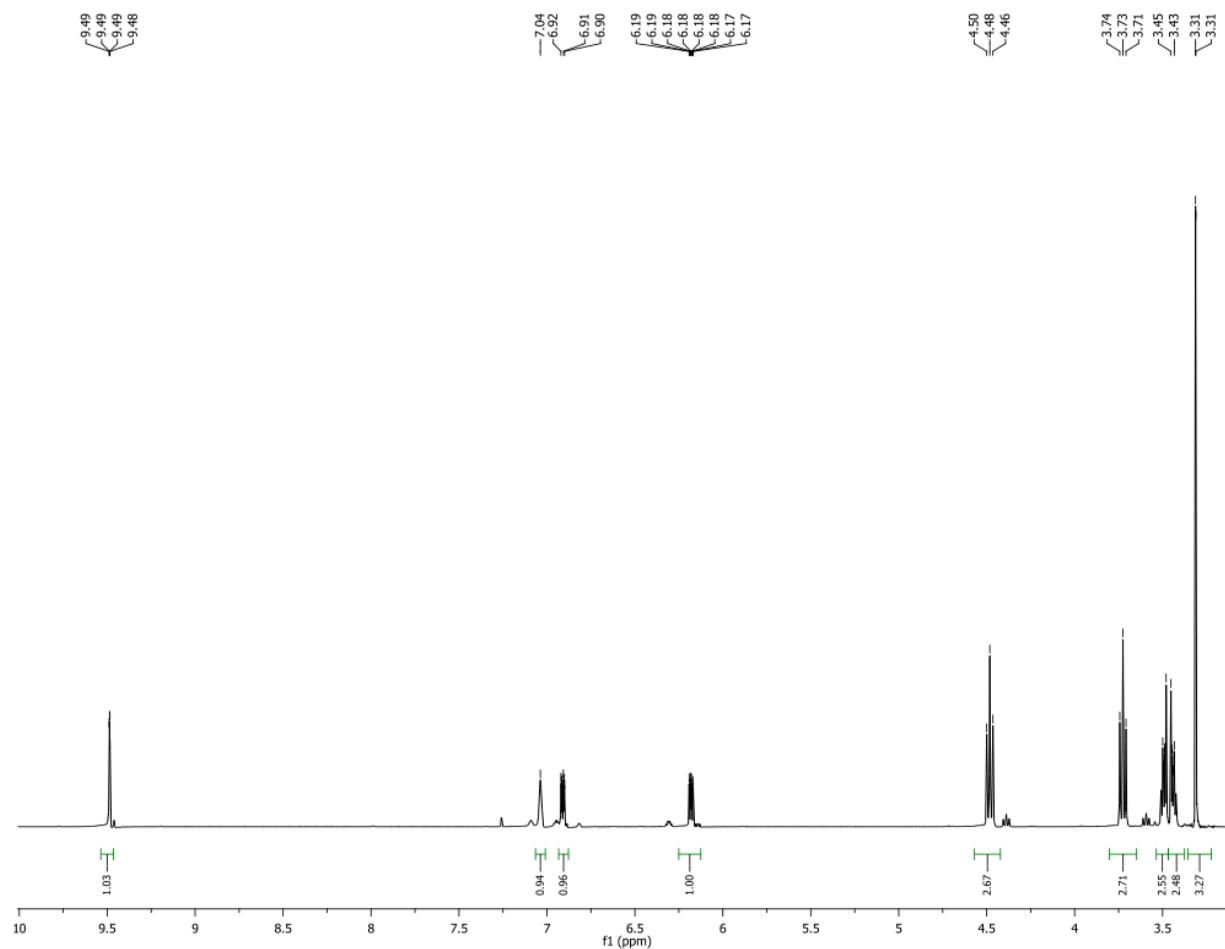

**Figure S1.** <sup>1</sup>H NMR spectrum of compound 3.

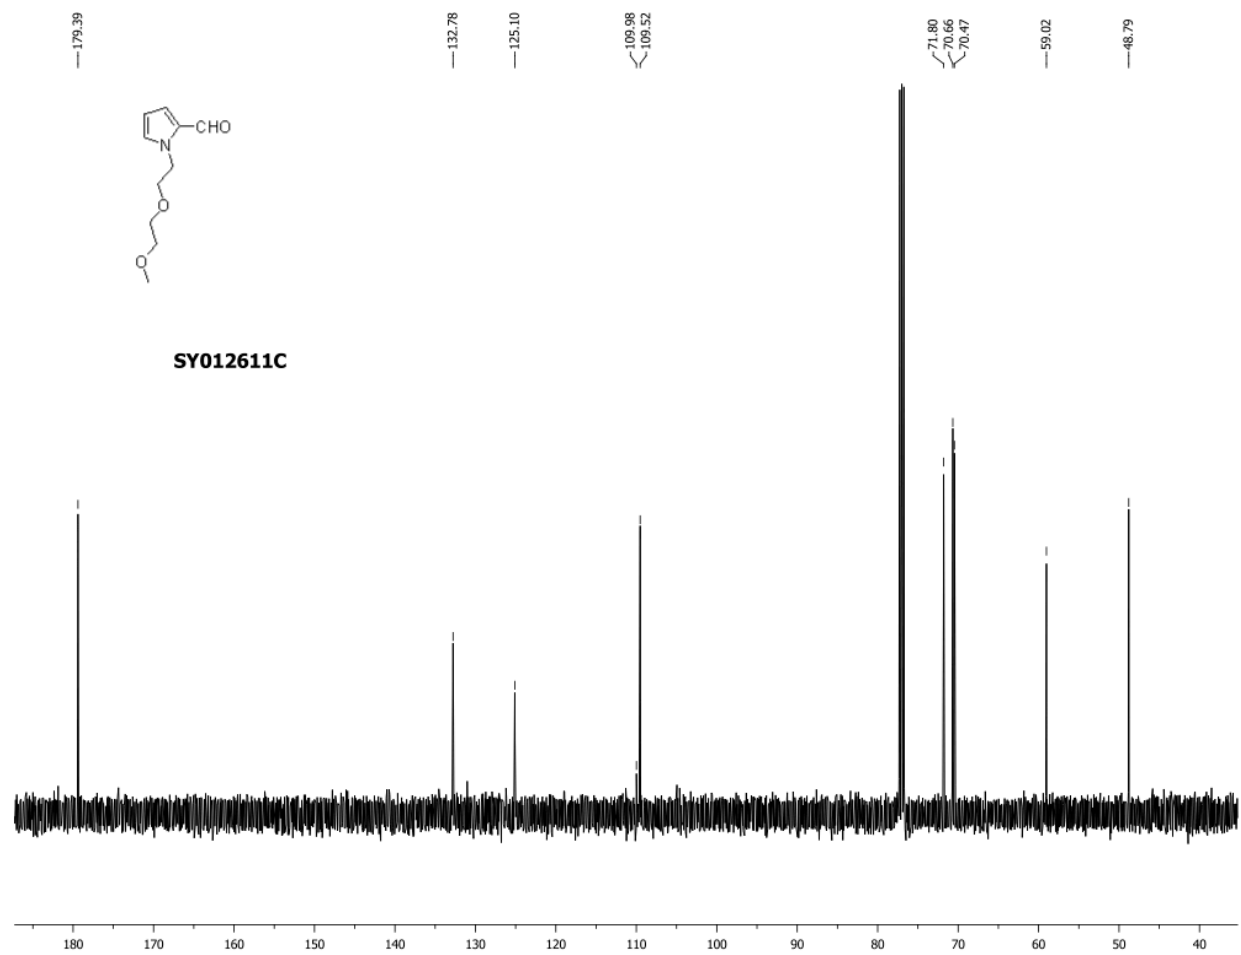

**Figure S2.** <sup>13</sup>C NMR spectrum of compound **3**.

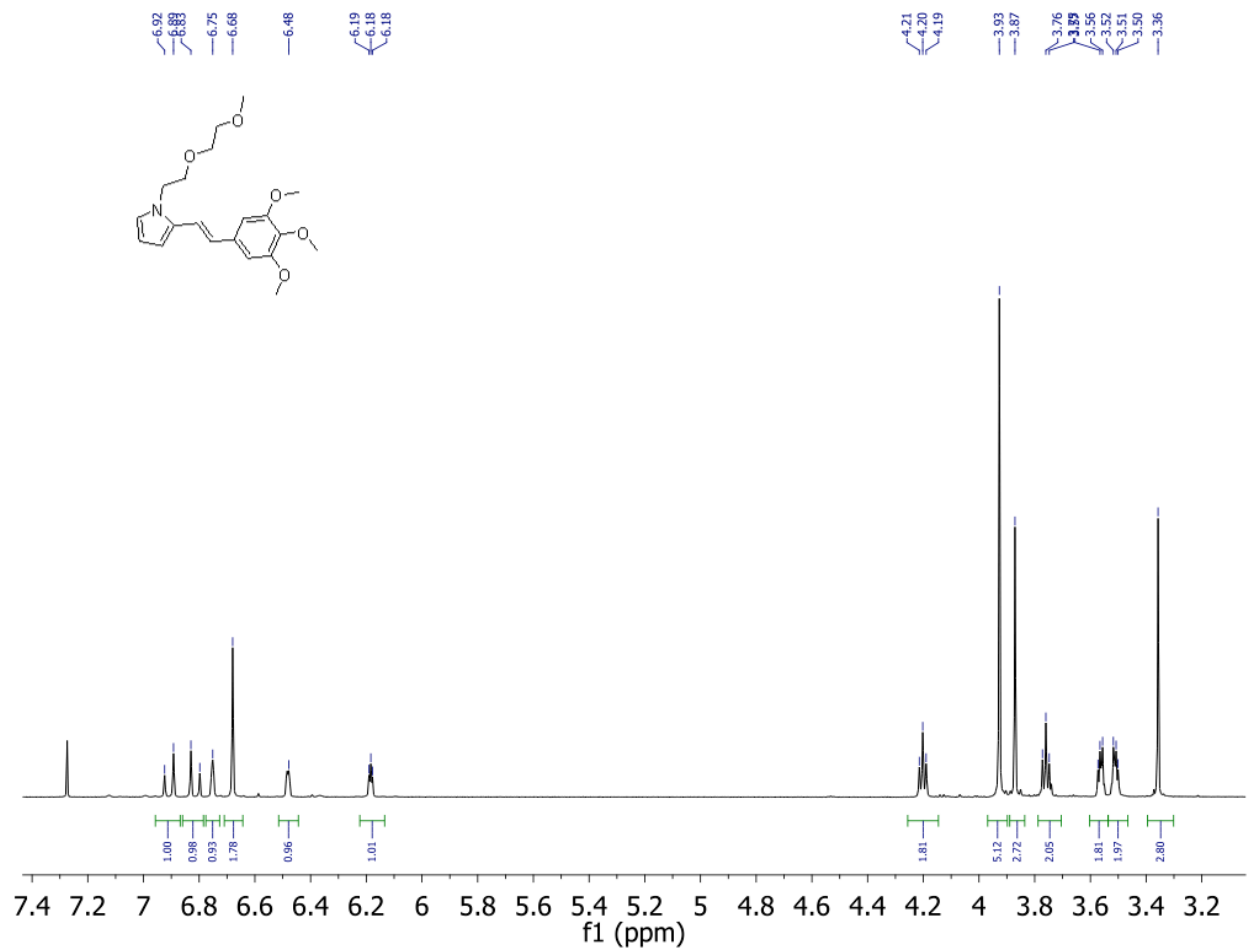

**Figure S3.** <sup>1</sup>H NMR spectrum of compound 4.

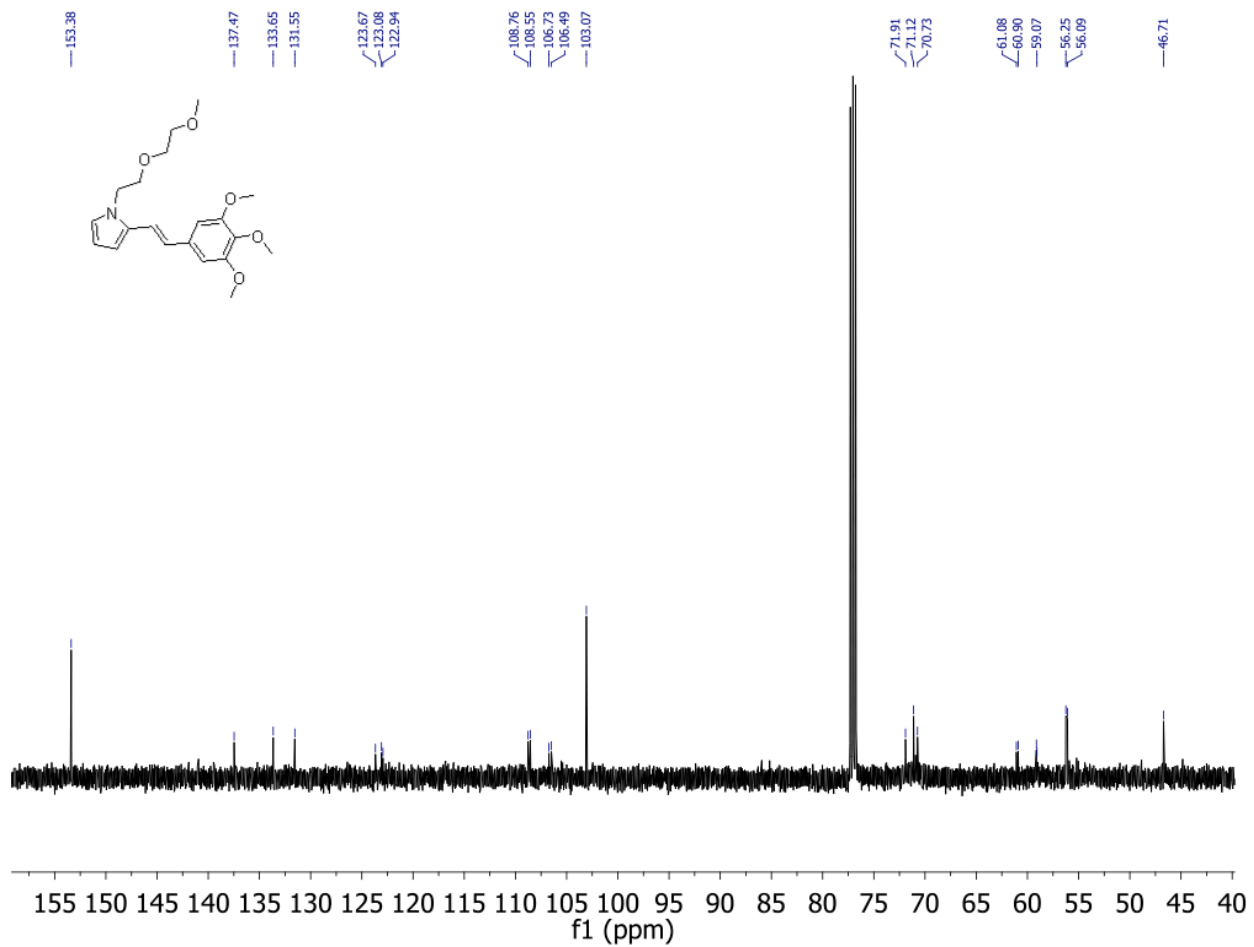

**Figure S4.**  $^{13}\text{C}$  NMR spectrum of compound 4.

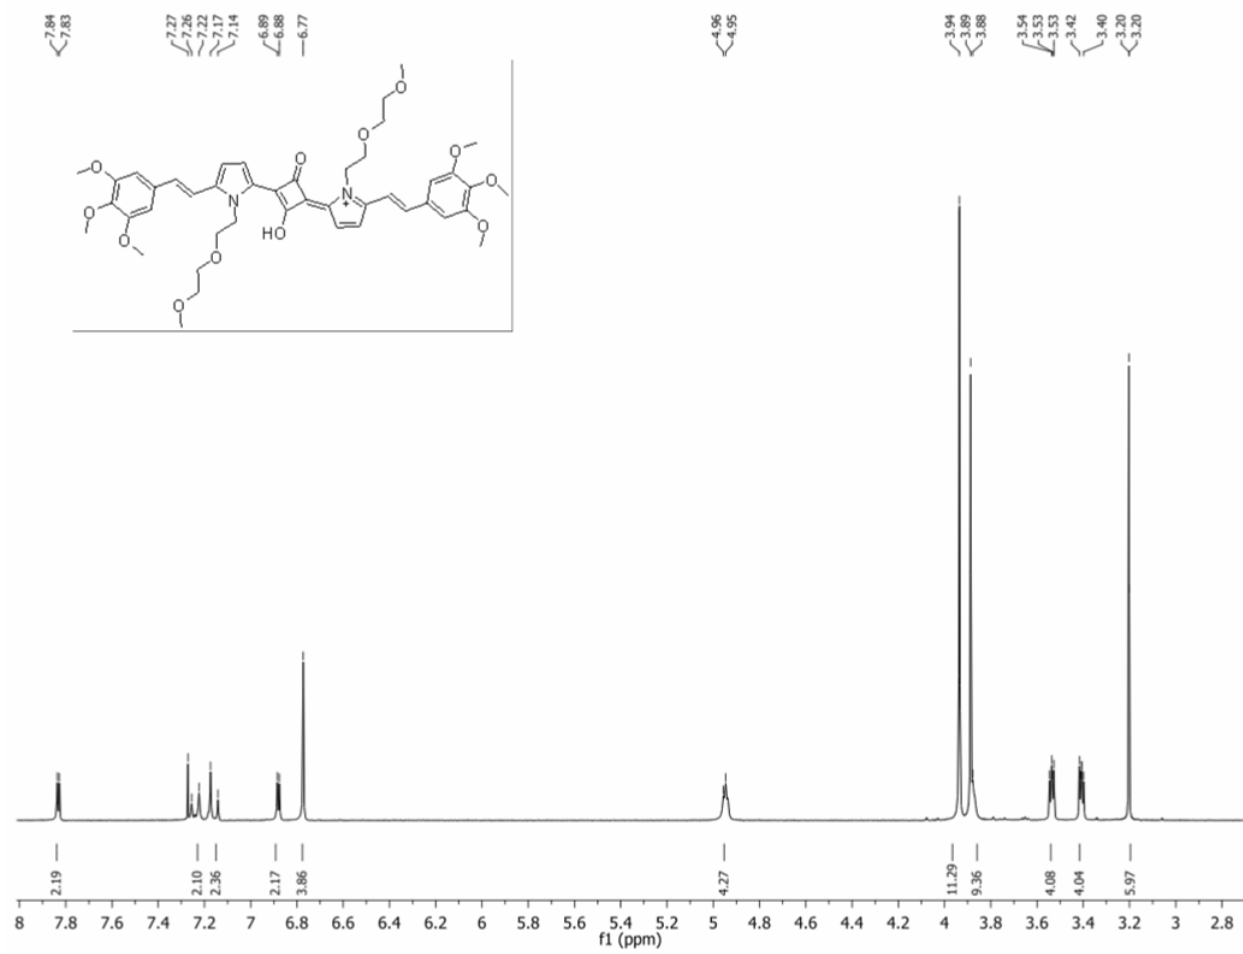

**Figure S5.**  $^1\text{H}$  NMR spectrum of SQ 1.

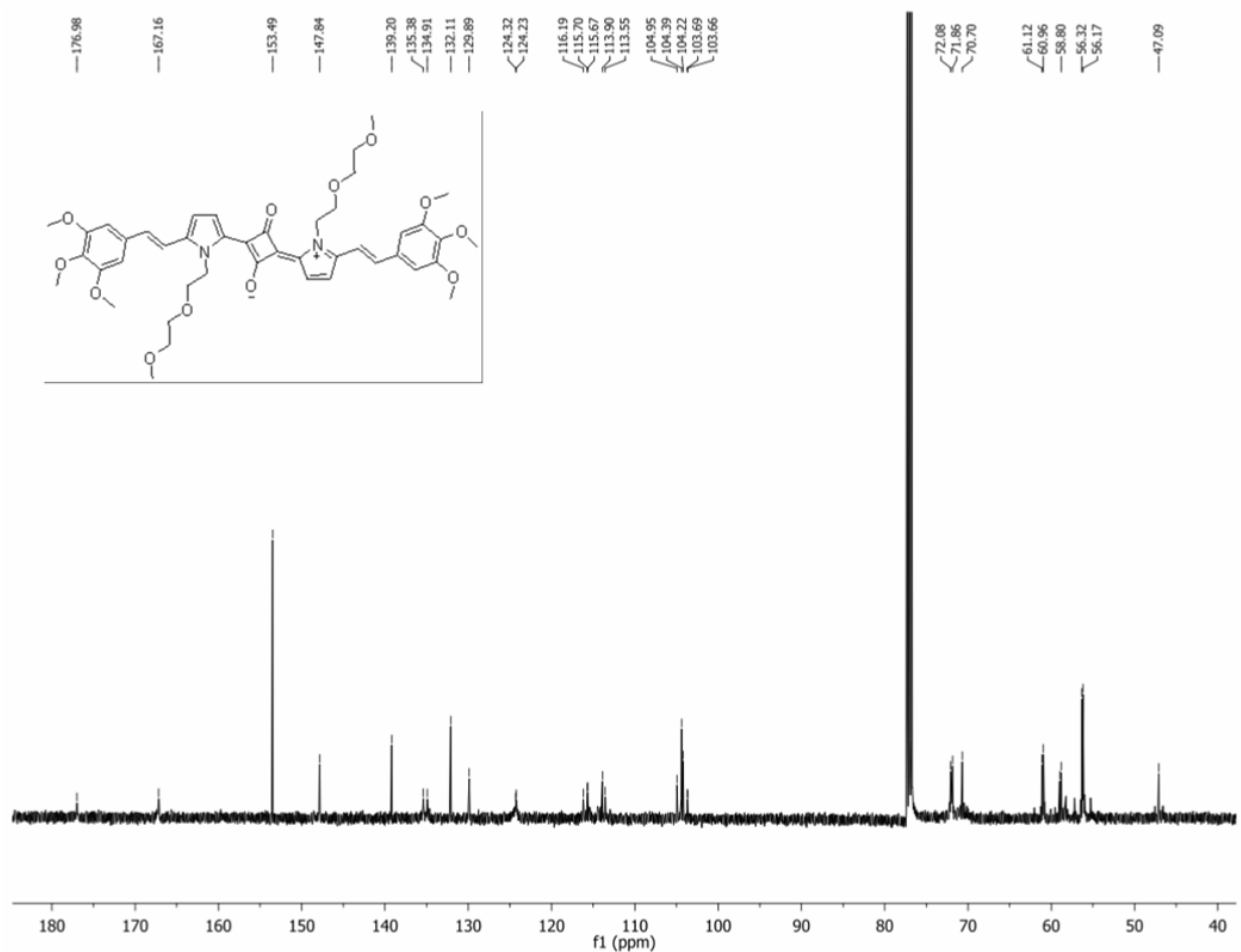

**Figure S6.** <sup>13</sup>C NMR spectrum of SQ 1.

## ***2 Linear spectroscopic measurements***

Absorption spectra were measured by Agilent 8453 UV-vis spectrophotometer. Fluorescence emission and excitation spectra were measured using a PTI Quantamaster Spectrofluorimeter with a Hamamatsu R928 photomultiplier tube (PMT) in acetonitrile (ACN), 1, 2-dichloromethane (DCM), DMSO, MeOH, and THF for SQ1 (Figure S7) and SQ 2 (Figure S8).

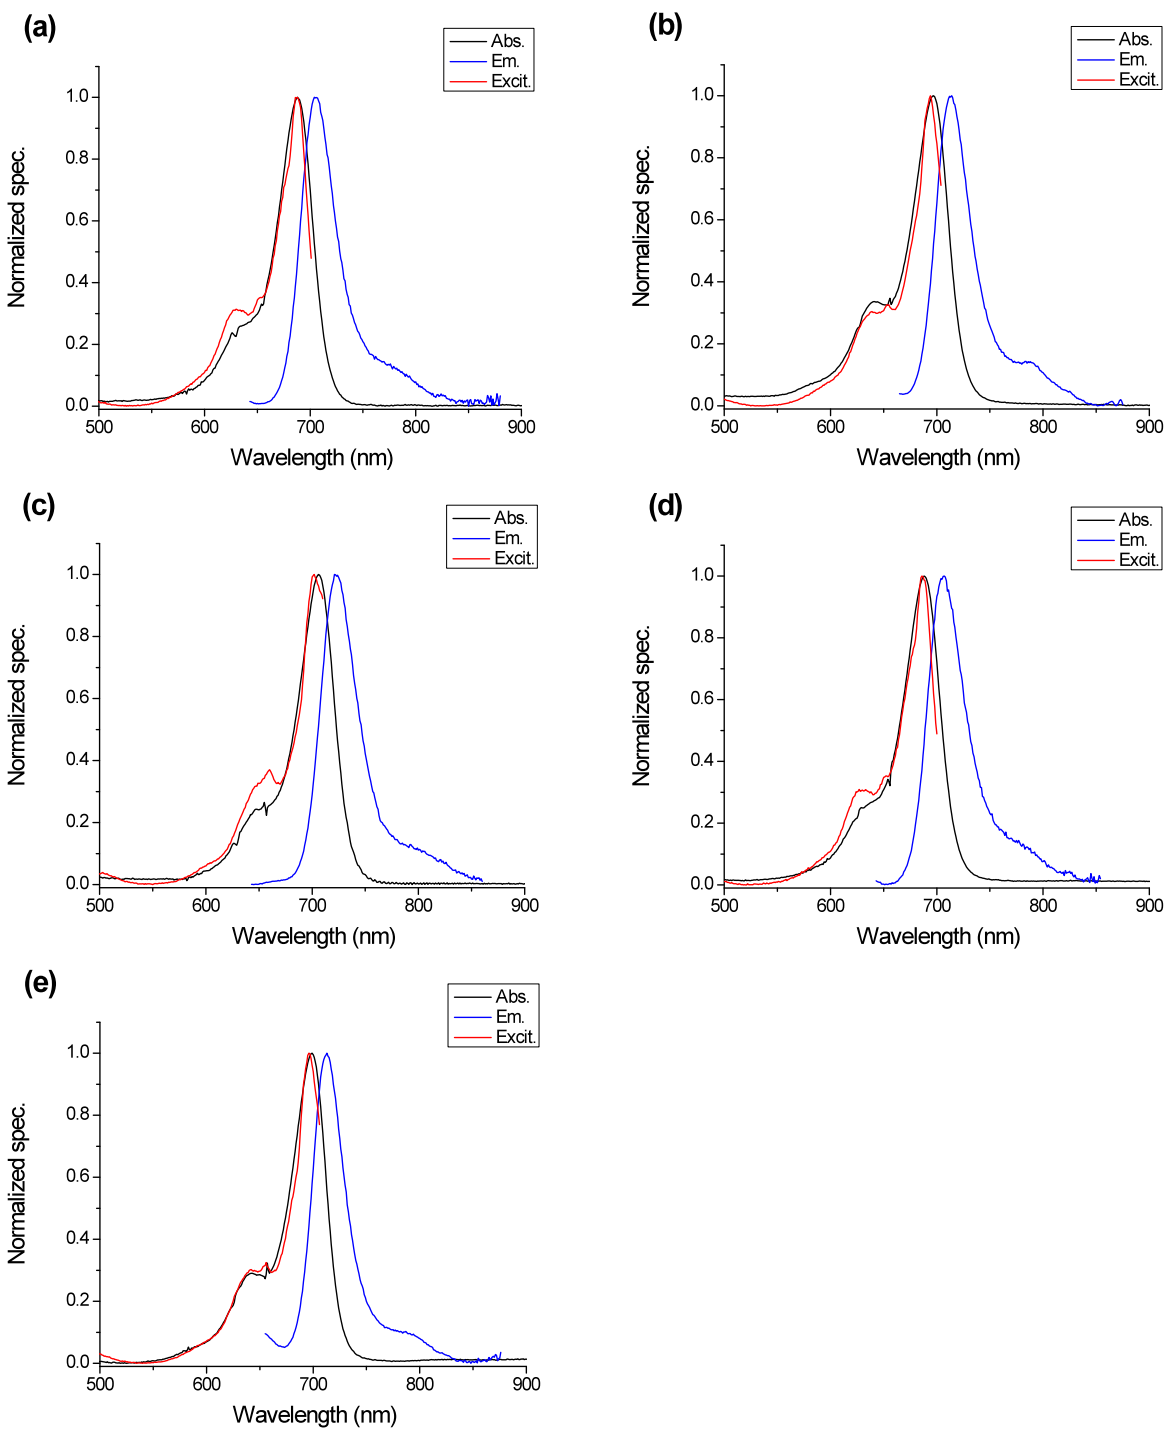

**Figure S7.** Absorption, fluorescence emission, and excitation spectra of SQ 1 in (a) ACN, (b) DCM, (c) DMSO, (d) MeOH, and (e) THF.



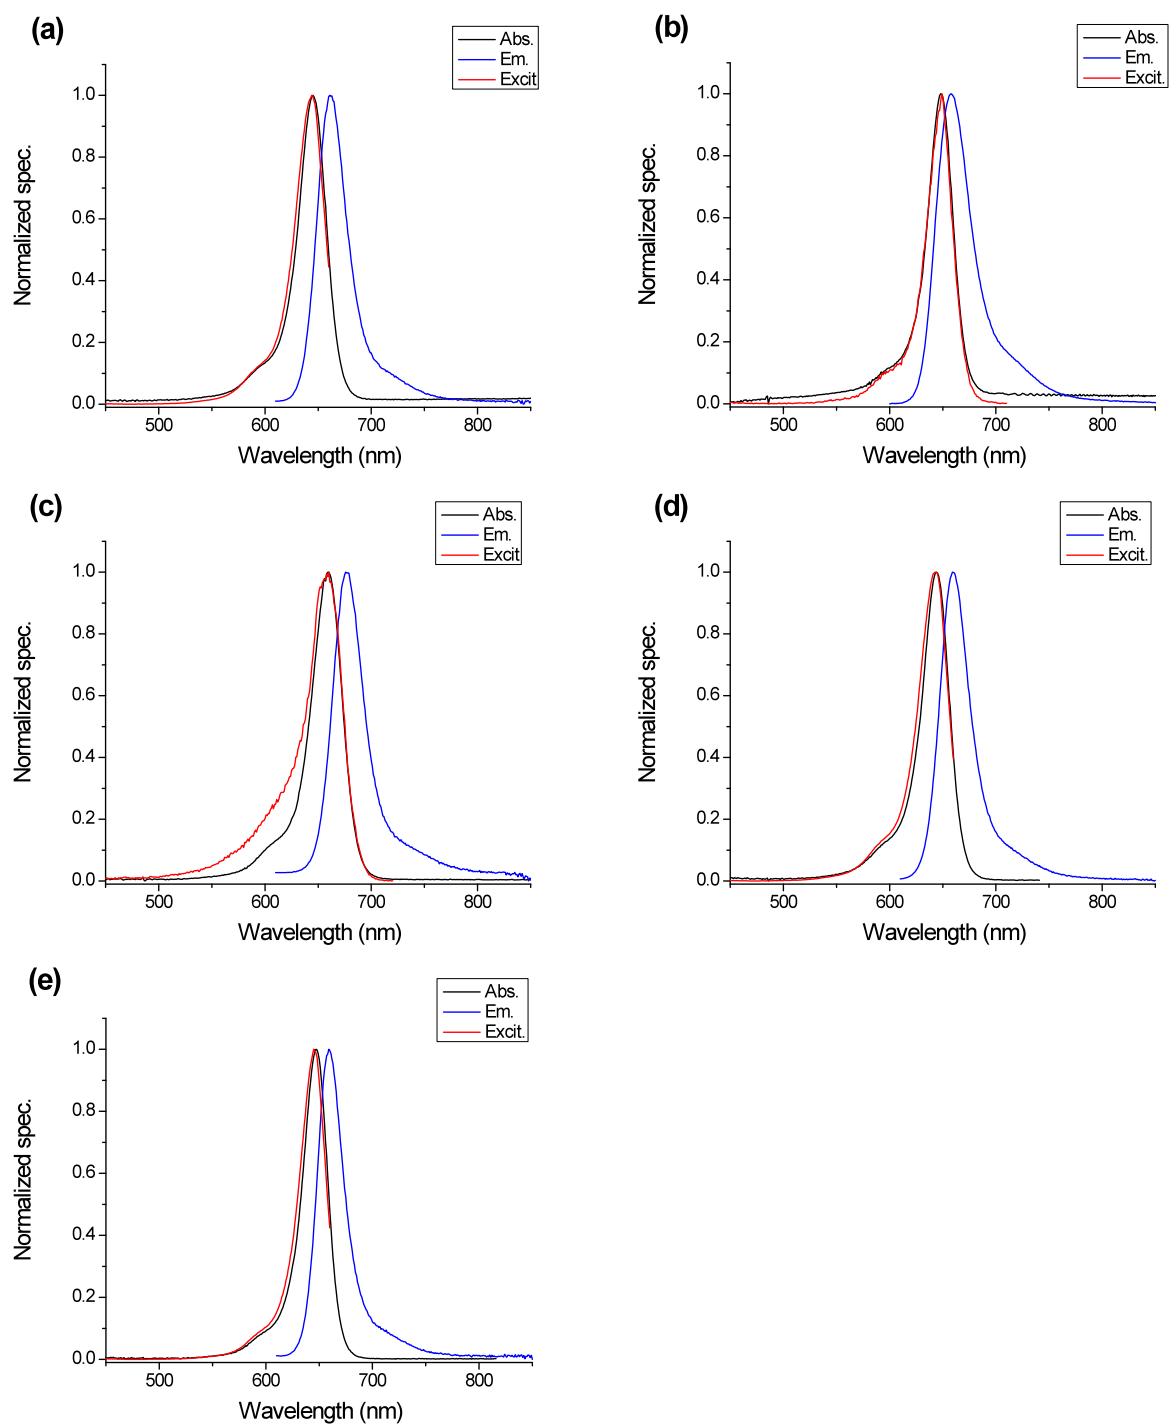

**Figure S8.** Absorption, fluorescence emission, and excitation spectra of SQ **2** in (a) ACN, (b) DCM, (c) DMSO, (d) MeOH, and (e) THF.

### 3 Photostability measurements

The photochemical stability (photodecomposition quantum yield) evaluations of squaraines **1** and **2** along with **Cy5** in DMSO were conducted by irradiating with the output of a 650 nm diode laser<sup>1</sup> (75 mW) of an Ar-degassed solution in a 10 mm path length quartz cuvette. Kinetic changes in the absorption spectra were monitored with an Agilent 8453 UV-vis spectrophotometer (Figure S9).

Photodecomposition quantum yields,  $\eta$ , were calculated as follows,<sup>1</sup>

$$\eta = \frac{(A_1 - A_0)N_A}{\epsilon I \left(1 - 10^{-\frac{A_1 + A_0}{2}}\right) (t_1 - t_0)}$$

where  $\eta$  is the photochemical decomposition quantum yield,  $A_1$  is absorbance maxim at  $t_1$ ,  $A_0$  is absorbance max at  $t_0$ ,  $N_A$  is Avogadro's number,  $\epsilon$  is molar absorbance in  $M^{-1} \cdot cm^{-1}$ ,  $(t_1 - t_0)$  is time exposed (s), and  $I$  is the intensity of laser in  $photon \cdot cm^{-2} \cdot s^{-1}$ .

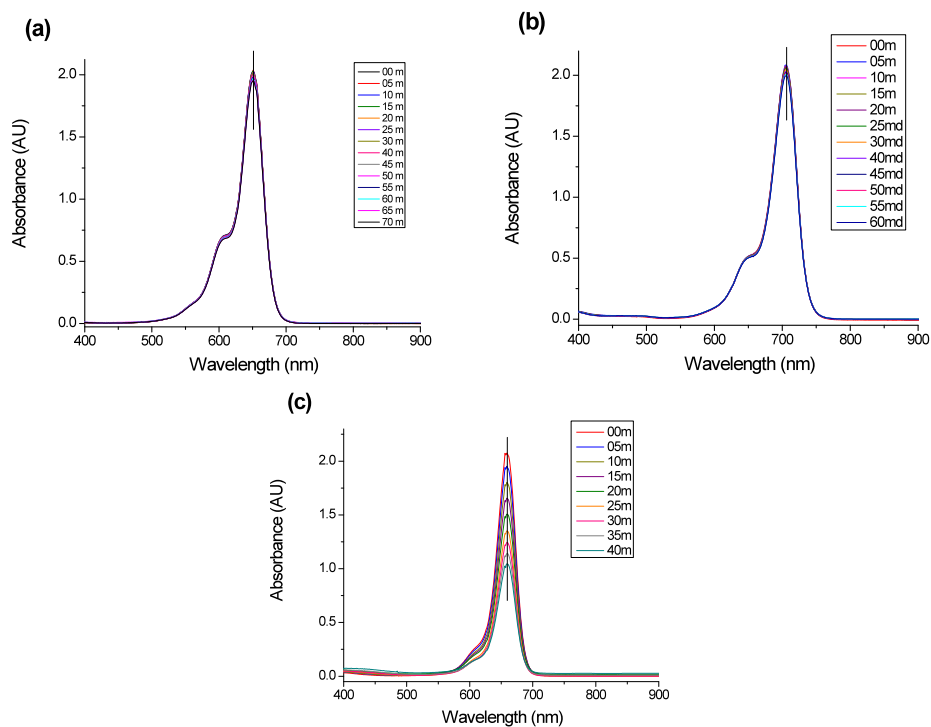

**Figure S9.** Time-dependent absorption spectra of corresponding dyes with irradiation at 650 nm for DMSO solutions of (a) **Cy5**, (b) **SQ 1**, and (c) **SQ 2**.

#### 4 Thermostability of squaraines 1 and 2

Thermostability study was conducted by thermogravimetric analysis (TGA, Q 5000 TA Instruments) and differential scanning calorimetry (DSC, Q1000 TA Instruments), as shown in Figure S10.

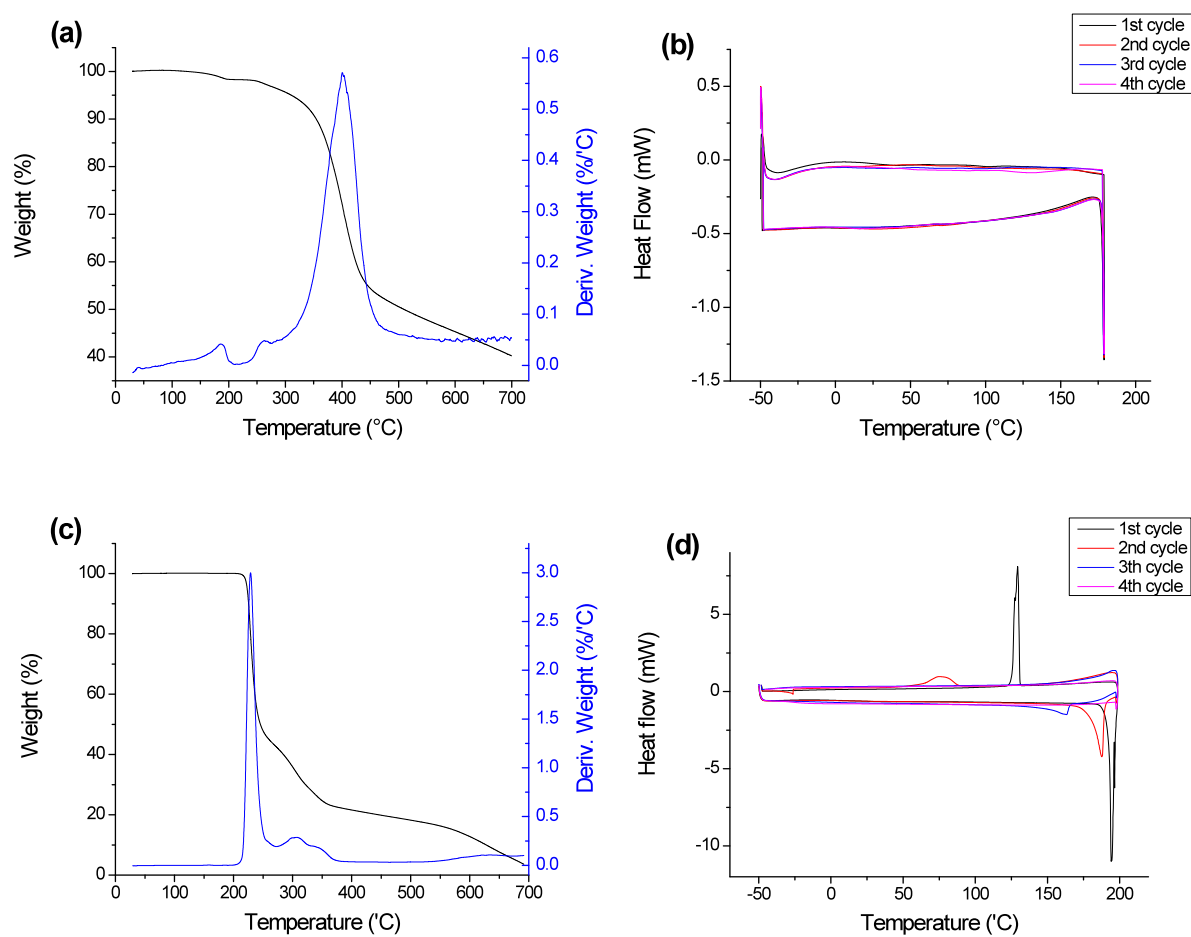

**Figure S10.** a) TGA and (b) DSC analyses of SQ 1, and (c) TGA and (d) DSC analyses of SQ 2.

### ***5 Linear and nonlinear optical properties of Cy5***

The absorption and fluorescence emission spectra of **Cy5** (Figure S11) were measured in DMSO with an Agilent 8453 UV-vis spectrophotometer and PTI Quantamaster Spectrofluorimeter, respectively. 2PA measurements (Figure S11) were performed using a tunable fs Ti:sapphire laser system (Coherent MIRA 900, pulse duration ~200 fs/pulse (FWHM), repetition rate 76 MHz) coupled with a PTI Spectrofluorimeter system via a fluorescence method. The two-photon absorption cross section was calculated as follows;

$$\delta_{2PA-S} = \delta_{2PA-R} \frac{\Phi_r C_r \langle F \rangle_s n_s \langle P_r \rangle^2}{\Phi_s C_s \langle F \rangle_r n_r \langle P_s \rangle^2}$$

where subscripts *R* and *S* refer to the reference and sample, respectively,  $\Phi$  is fluorescence quantum yield, *C* is the concentration, *F* is the integrated area, *n* is the refractive index of the solvent, and *P* is the incident power of the laser. The experimental fluorescence excitation and detection conditions were measured with negligible reabsorption.<sup>2</sup> The quadratic dependence of two-photon induced fluorescence intensity on the excitation power was verified for each excitation wavelength.

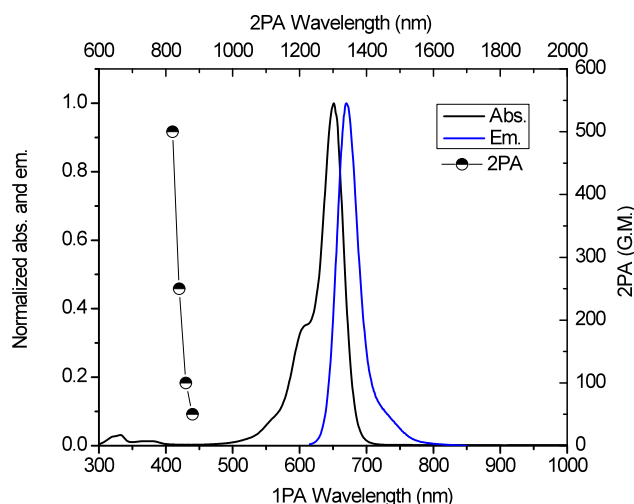

**Figure S11.** Linear and nonlinear optical characterization of **Cy5** (1 GM (Göppert Meyer) =  $10^{50} \text{ cm}^4 \text{ s/photon}^{-1}$ , uncertainty of the 2PA value = 15 %), absorption (black), emission (blue), and 2PA cross sections (black circles).

### ***6 Linear and nonlinear properties of micelles***

The open aperture Z-scan method<sup>3</sup> was performed to measure 2PA cross sections of micelle-encapsulated squaraines **1** and **2** along with **Cy5** (Figure S12), using a fs Ti:sapphire amplified system (Coherent, MIRA and Legend) with an optical parametric amplifier (model OPerA) providing laser pulses  $\sim 100$  fs (FWHM) duration with 1 kHz repetition rate. The concentration of solution concentration was ca.  $10^{-3}$  M in a 1 mm quartz cuvette at room temperature.

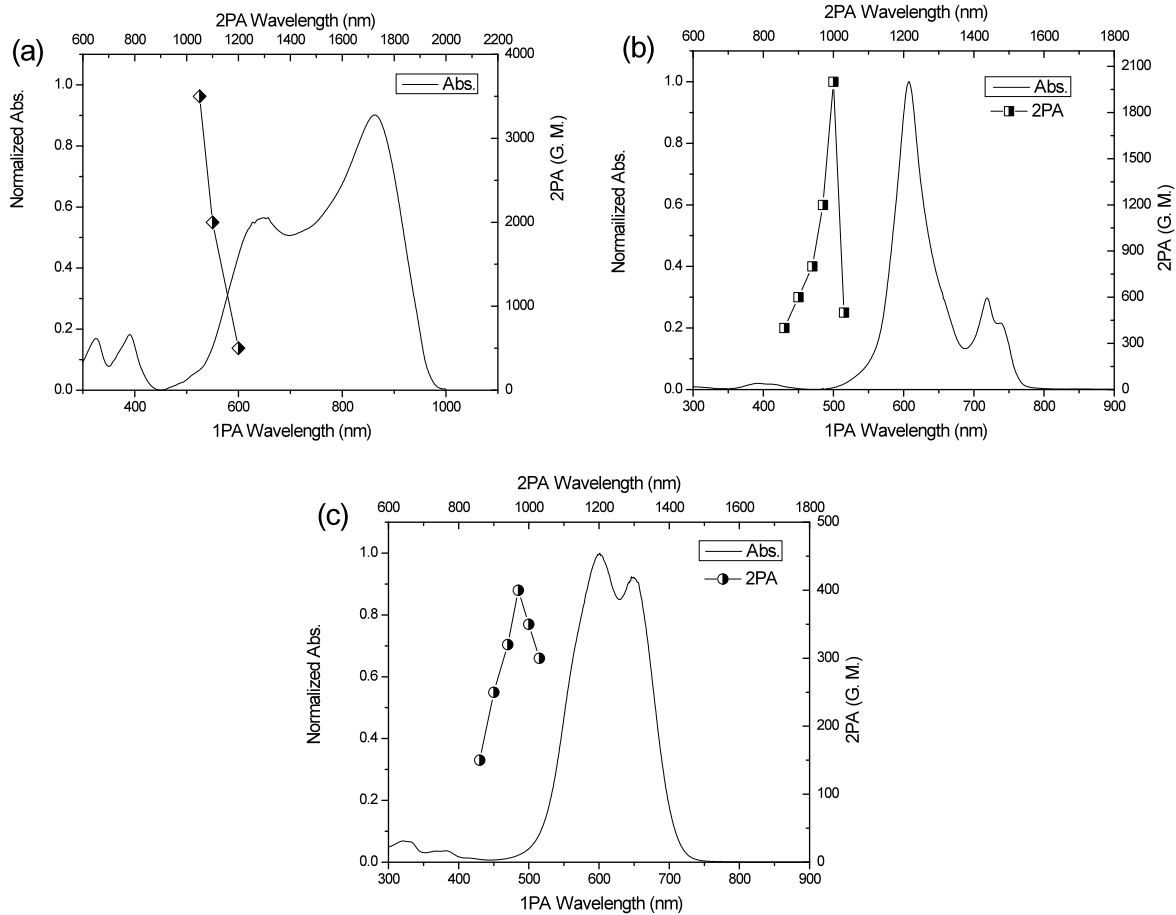

**Figure S12.** Linear and nonlinear optical characterization of micelle mixtures of (a) SQ 1, (b) SQ 2, and (c) Cy5 (error  $\pm 25\%$ ).

### 7 Cytotoxicity assays of squaraines 1 and 2 in HCT 116 and COS 7

HCT116 and COS 7 cells were prepared for cytotoxicity tests and incubated for 20 h with the SQ dye encapsulated in micelles, followed by further incubation additional for 4 h with CellTiter 96® Aqueous One Solution reagent (MTS assay) at 37 °C (Figure S13).

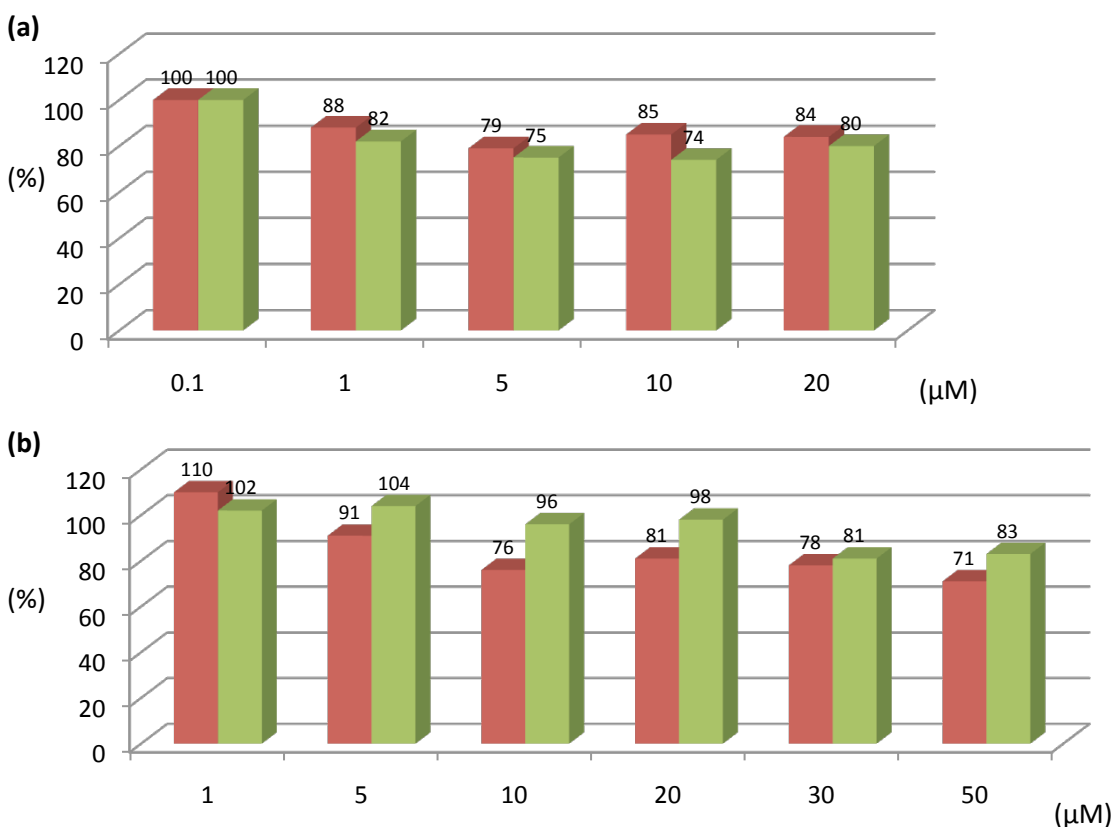

**Figure S13.** Cell viability of (a) SQ 1 and (d) SQ 2 in **HCT 116** and **COS 7** cells (error  $\pm 10\%$ ).

### **8 1PFM images of squaraine 1 and 2 in HCT 116 and COS 7**

A confocal microscope system (Olympus IX70/Fluoview 300) equipped with a QImaging cooled CCD (Model Retiga EXi) and mercury lamp 100 W was used for 1PFM imaging of HCT 116 cells with SQ 1 (Figure S14) and SQ 2 (Figure S15) and COS 7 cells with SQ 1 (Figure S16) and SQ 2 (Figure S17), followed by staining with a Hoechst nuclear stain, using a 60× microscopic objective (UPlanSApo 60×, NA = 1.35, Olympus).

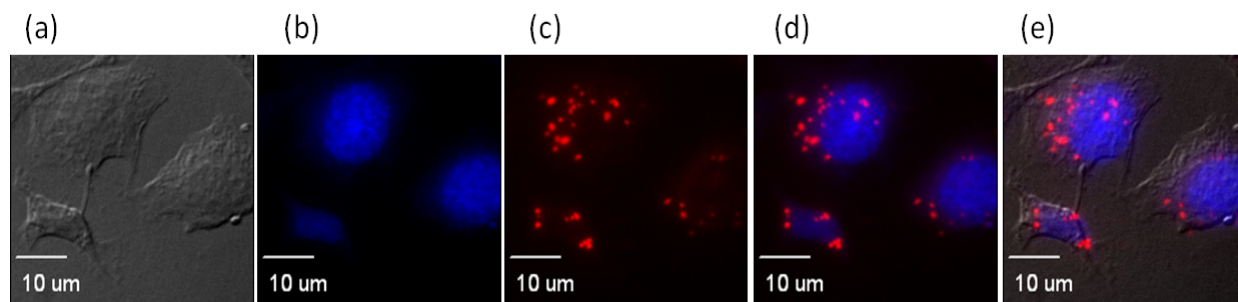

**Figure S14.** HCT 116 of 20  $\mu\text{M}$  SQ 1 (a) DIC, (b) 1PA image with Fluo out (Ex 377/50, DM 409, Em 525/40), (c) 1PA image with Cy5 filter (Ex 630/50, DM 660, Em 690/40), (d) 1PA overlaid fluorescence image, (e) 1PA overlaid image (a) to (c) (scale bar = 10  $\mu\text{m}$ ). Emission from SQ 1 is in red while the emission from Hoechst is in red.



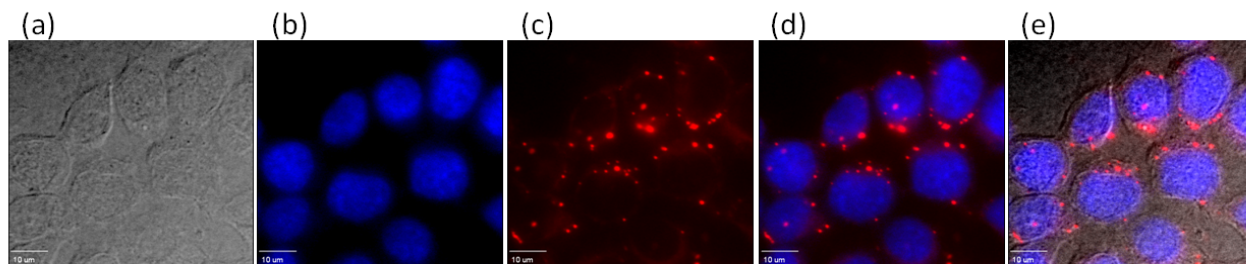

**Figure S15.** HCT 116 of 20  $\mu\text{M}$  SQ 2 (a) DIC, (b) 1PA image with Fluo out (Ex 377/50, DM 409, Em 525/40), (c) 1PA image with Cy 5 filter (Ex 630/50, DM 660, Em 690/40), (d) 1PA overlaid fluorescence image, (e) 1PA overlaid image (a) to (c) (scale bar = 10  $\mu\text{m}$ ). Emission from SQ 2 is in red while the emission from Hoechst is in red.

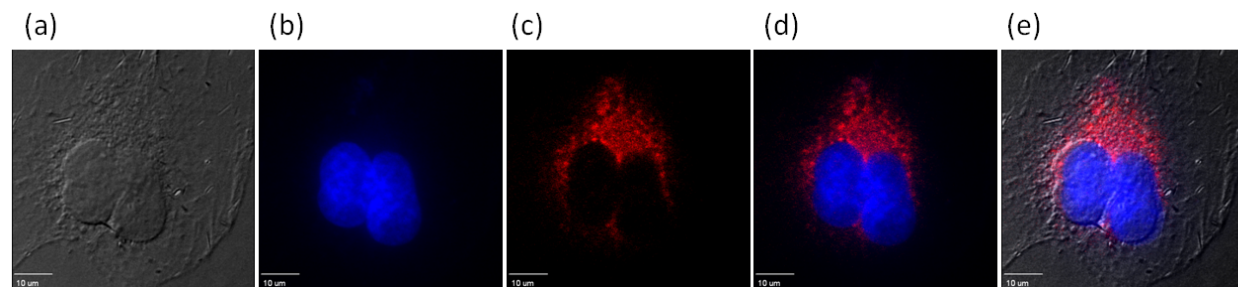

**Figure S16.** COS 7 of 20  $\mu\text{M}$  SQ 1 (a) DIC, (b) 1PA image with Fluo out (Ex 377/50, DM 409, Em 525/40), (c) 1PA image with Cy 5 filter (Ex 630/50, DM 660, Em 690/40), (d) 1PA overlaid fluorescence image, (e) 1PA overlaid image (a) to (c) (scale bar = 10  $\mu\text{m}$ ). Emission from SQ 1 is in red while the emission from Hoechst is in red.

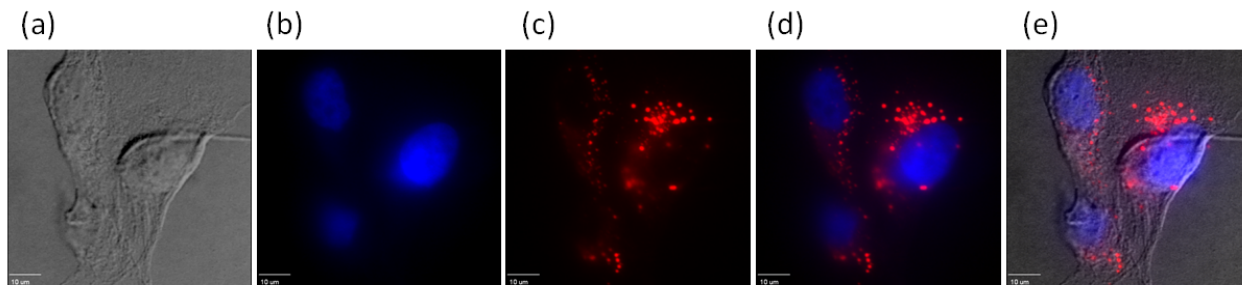

**Figure S17** COS 7 of 20  $\mu\text{M}$  SQ 2 (a) DIC, (b) 1PA image with Fluo out (Ex 377/50, DM 409, Em 525/40), (c) 1PA image with Cy 5 filter (Ex 630/50, DM 660, Em 690/40), (d) 1PA overlaid fluorescence image, (e) 1PA overlaid image (a) to (c) (scale bar = 10  $\mu\text{m}$ ). Emission from SQ 2 is in red while the emission from Hoechst is in red.

### **References**

- (1) Corredor, C. C.; Belfield, K. D.; Bondar, M. V.; Przhonska, O. V.; Yao, S. *J. Photochem. Photobiol., A* **2006**, *184*, 105-112.
- (2) Belfield, K. D.; Bondar, M. V.; Hales, J. M.; Morales, A. R.; Przhonska, O. V.; Schafer, K. J. *J. Fluoresc.* **2005**, *15*, 3-11.
- (3) Sheik-bahae, M.; Said, A. A.; Wei, T.-h.; Hagan, D. J.; Van Stryland, E. W. *IEEE J. Quantum Electron.* **1990**, *26*, 760-769.
